# Supplementary material for: A Demand Estimator Based on a Nested Logit Model
Source: Atypon-hosted journal article supplement (doi:10.1287/trsc.2016.0671), 2016-06-20
Supplement: trsc.2016.0671-sm.pdf [file trsc.2016.0671-sm.pdf]

# Appendix A

## Convergence of the NIFE's Solution Algorithm

In Section (3), we have shown that the NIFE's solution algorithm adjusts the vector of LMs sequentially along unit directions  $e_1, e_2, \dots, e_{n_w}$ . In the  $n$ th iteration,  $W_n$  is adjusted  $n_w$  times. Let  $w_{n,k}$  denote the vector of LMs after the  $k$ th adjustment, and  $\tau_{n,k}$  be the adjustment factor along the unit direction  $e_k$ . That is, we have

$$w_{n,0} = W_n, \quad (31)$$

$$w_{n,k} = w_{n,k-1} + \tau_{n,k} e_k, k = 1, 2, \dots, n_w, \quad (32)$$

$$W_{n+1} = w_{n,n_w}. \quad (33)$$

**Proposition A.1.** *Let  $\Psi$  be one iteration of the solution algorithm, that is,*

$$W_{n+1} = \Psi(W_n).$$

*If  $W_n \notin \Omega$ , then*

$$\theta(W_{n+1}) > \theta(W_n),$$

*where  $\Omega$  is defined by Eq (29).*

*Proof.* Since  $W_n \notin \Omega$ , there must exist an adjustment  $\tau_{n,k_0} \neq 0, 1 \leq k_0 \leq n_w$ , such that

$$w_{n,k_0} = w_{n,k_0-1} + \tau_{n,k_0} e_{k_0}. \quad (34)$$

Note that, by Eq (20), we have

$$\theta(w_{n,k_0}) = \inf\{H(w_{n,k_0})(F), F \in R_+^{n_f}\}.$$

By Proposition (3.4) and Eq (34), we have

$$\theta(w_{n,k_0}) = H(w_{n,k_0})(F_{w_{n,k_0}}) = H(w_{n,k_0-1})(F_{w_{n,k_0}}) + \tau_{n,k_0} e_{k_0}^t \times \nabla \theta(w_{n,k_0}).$$

By Proposition (3.6)-(3.9), we have

$$\theta(w_{n,k_0}) \geq H(w_{n,k_0-1})(F_{w_{n,k_0}}).$$

Since  $\tau_{n,k_0}$  is made to only one component of  $w_{n,k_0-1}$ , we have

$$F_{w_{n,k_0-1}} \neq F_{w_{n,k_0}}.$$

By Proposition (3.4),  $X(w_{n,k_0-1}) = \{F_{w_{n,k_0-1}}\}$  is a singleton. Therefore, we have

$$\theta(w_{n,k_0}) \geq H(w_{n,k_0-1})(F_{w_{n,k_0}}) > H(w_{n,k_0-1})(F_{w_{n,k_0-1}}) = \theta(w_{n,k_0-1}).$$

Thus, we have

$$\theta(W_{n+1}) \geq \theta(w_{n,k_0}) > \theta(w_{n,k_0-1}) \geq \theta(W_n).$$

□

Adding Eq (31), Eq (32) and Eq (33) together, we have,

$$W_{n+1} = W_n + \tau_{n,1}e_1 + \tau_{n,2}e_2 + \dots, \tau_{n,n_w}e_{n_w}.$$

For simplicity, the above equation is written in the following matrix form:

$$W_{n+1} = W_n + T_n I, \tag{35}$$

where  $T_n = (\tau_{n,1}, \tau_{n,2}, \dots, \tau_{n,n_w})$  and  $I$  is the identity matrix.

**Proposition A.2.** *Let  $W_n \rightarrow \overline{W}$ , and  $V_n \rightarrow \overline{V}$ , as  $n \rightarrow +\infty$ , where  $V_n = \Psi(W_n)$ . Since  $D_w$  is closed, we have  $\overline{V}, \overline{W} \in D_w$ . Further, we have*

$$\overline{V} = \Psi(\overline{W}). \tag{36}$$

*Proof.* By Eq (35), we have

$$V_n = W_n + T_n I. \tag{37}$$

The  $\{W_n\}_n$  and  $\{V_n\}_n$  are convergent sequences. Therefore, by Eq (37), sequence  $\{T_n\}_n$  is also convergent. That is, we have

$$T_n \rightarrow T, \text{ as } n \rightarrow +\infty,$$

where  $T = (\tau_1, \tau_2, \dots, \tau_{n_w})$ . In other words, we have

$$\tau_{n,k} \rightarrow \tau_k, \text{ as } n \rightarrow +\infty, \text{ for } k = 1, \dots, n_w.$$

Since sequences  $\{W_n\}_n$ ,  $\{V_n\}_n$ , and  $\{\tau_{n,k}\}_n, k = 1, \dots, n_w$ , are convergent, by Eq (31) - (33), we have

$$\{w_{n,k}\}_n, \text{ for } k = 0, 1, \dots, n_w,$$

are also convergent. We assume that

$$\lim_{n \rightarrow +\infty} w_{n,k} = w_k, \text{ for } k = 0, 1, \dots, n_w. \tag{38}$$

Then, by letting  $n \rightarrow +\infty$  in Eq (31) - (33), we have

$$\begin{aligned} w_0 &= \overline{W}, \\ w_k &= w_{k-1} + \tau_k e_k, \quad k = 1, \dots, n_w, \\ \overline{V} &= w_{n_w}. \end{aligned} \tag{39}$$

To show Eq (36) holds, we need to show that

$$\theta(w_k) = \theta(w_{k-1} + \tau_k e_k) \geq \theta(w_{k-1} + s e_k), \quad s \in D_k, \quad \text{for } k = 1, 2, \dots, n_w,$$

where  $D_k$  is the feasible region of  $s$ .

For generality, we assume that the adjustment  $\tau_k$  is made to LM  $\lambda$  which is the  $k$ th component of  $w_{k-1}$ . Consider the following two cases of  $\lambda$ :

**Case 1:**  $\lambda$  is associated with constraints (1) or (2). In this case,  $D_k = D_{n,k} = R$ . By Proposition (3.6), (3.7), and Eq (39), for any  $s \in D_{n,k}$ , we have

$$\theta(w_{n,k}) = \theta(w_{n,k-1} + \tau_{n,k} e_k) \geq \theta(w_{n,k-1} + s e_k), \quad \text{for } k = 1, 2, \dots, n_w.$$

By the continuity of  $\theta$ , as  $n \rightarrow +\infty$ , we have

$$\theta(w_k) = \theta(w_{k-1} + \tau_k e_k) \geq \theta(w_{k-1} + s e_k), \quad s \in D_k, \quad \text{for } k = 1, 2, \dots, n_w$$

**Case 2:**  $\lambda$  is associated with constraints (3). Let  $\lambda_n$  be the  $k$ th component of  $w_{n,k-1}$ , then, by Eq (38), we have

$$\lim_{n \rightarrow +\infty} \lambda_n = \lambda. \tag{40}$$

Further, we have

$$D_k = \{s : s \geq -\lambda\}, \quad \text{and } D_{n,k} = \{s : s \geq -\lambda_n\}, \quad k = 1, 2, \dots, n_w.$$

Given  $k$ , for any  $s \in (-\lambda, +\infty)$ , by Eq (40), there exists a  $N > 0$  such that  $-\lambda_n < s$ . This means  $s \in D_{n,k}$  for  $n > N$ . Therefore, for the  $s$ , we have

$$\theta(w_{n,k}) = \theta(w_{n,k-1} + \tau_{n,k} e_k) \geq \theta(w_{n,k-1} + s e_k).$$

Let  $n \rightarrow +\infty$ , we have

$$\theta(w_k) = \theta(w_{k-1} + \tau_k e_k) \geq \theta(w_{k-1} + s e_k).$$

We have shown that the above inequality holds for every  $s \in (-\lambda, +\infty)$ . By the continuity of  $\theta$ , we have

$$\theta(w_k) = \theta(w_{k-1} + \tau_k e_k) \geq \theta(w_{k-1} + s e_k), \quad \text{for } s \in D_k.$$

□

**Proposition A.3.** Let  $\{W_n\}_{n=1}^{+\infty}$  be the sequence produced by the solution algorithm. If problem (P) is feasible, then we have

1)

$$\lim_{n \rightarrow +\infty} \|W_{n+1} - W_n\| = 0. \tag{41}$$

2) The solution algorithm is convergent. That is, every convergent subsequence of  $\{W_n\}_{n=1}^{+\infty}$  has a limit in  $\Omega$ . In other words, all accumulation points of  $\{W_n\}_{n=1}^{+\infty}$  belong to  $\Omega$ , where  $\Omega$  is the set defined by (29).

3)  $\theta(W_n) \rightarrow \theta(\overline{W})$ , for some  $\overline{W} \in \Omega$ .

*Proof.* By Proposition (A.1), the sequence  $\{\theta(W_n)\}_{n=1}^{+\infty}$  is monotonically increasing. Since problem (P) is feasible, the sequence is bounded and hence convergent. Therefore, we have

$$\lim_{n \rightarrow +\infty} \theta(W_{n+1}) - \theta(W_n) = 0, \quad (42)$$

For a given  $k$ ,  $1 \leq k \leq n_w$ , for any  $n$ , by the proof of Proposition (A.1), we have

$$\theta(W_{n+1}) \geq \theta(w_{n,k}) \geq \theta(w_{n,k-1}) \geq \theta(W_n).$$

That is

$$\theta(W_{n+1}) - \theta(W_n) \geq \theta(w_{n,k}) - \theta(w_{n,k-1}) \geq 0$$

By Eq (42), we have

$$\lim_{n \rightarrow +\infty} \theta(w_{n,k}) - \theta(w_{n,k-1}) = 0. \quad (43)$$

Using Eq (8), Eq (9), Eq (19), and Proposition (3.4), we have

$$\begin{aligned} \theta(w_{n,k-1}) = & \sum_i \lambda_i M_i - \sum_{d \in D, a \in B^d, k \in \kappa_a^d} \eta_{k,a}^d C_{k,a}^d + \sum_{d \in D, a \in B^d, k \in \kappa_a^d} \omega_{k,a}^d O_{k,a}^d - \sum_{d \in D, a \in B^d} (1 - \mu_a^d) q_a^d \\ & - \sum_{d \in D, a \in B^d, k \in \kappa_a^d} \mu_a^d f_{k,a}^d, \end{aligned} \quad (44)$$

where  $f_{k,a}^d$ s and  $q_a^d$ s are the components of  $F_{w_{n,k-1}}$ . By Eq (32),  $w_{n,k}$  and  $w_{n,k-1}$  have at most one different component (i.e., the  $k$ th component). By Eq (44), we have

$$\theta(w_{n,k}) - \theta(w_{n,k-1}) = \begin{cases} \tau_{n,k} M_i + \sum_{D, B^d, \kappa_a^d} \mu_a^d f_{k,a}^d \left\{ 1 - \exp\left(\frac{\tau_{n,k} \delta_{k,i}^d}{\mu_a^d}\right) \right\}, & \text{if } \tau_{n,k} \text{ is made to } \lambda_i, \\ (1 - \mu_a^d) q_a^d \left\{ 1 - \exp\left(\frac{-\tau_{n,k}}{1 - \mu_a^d}\right) \right\} + \sum_{k \in \kappa_a^d} \mu_a^d f_{k,a}^d \left\{ 1 - \exp\left(\frac{\tau_{n,k}}{\mu_a^d}\right) \right\}, & \text{if } \tau_{n,k} \text{ is made to } \nu_a^d, \\ -\tau_{n,k} C_{k,a}^d + \mu_a^d f_{k,a}^d \left\{ 1 - \exp\left(\frac{-\tau_{n,k}}{\mu_a^d}\right) \right\}, & \text{if } \tau_{n,k} \text{ is made to } \eta_{k,a}^d, \\ \tau_{n,k} O_{k,a}^d + \mu_a^d f_{k,a}^d \left\{ 1 - \exp\left(\frac{\tau_{n,k}}{\mu_a^d}\right) \right\}, & \text{if } \tau_{n,k} \text{ is made to } \omega_{k,a}^d. \end{cases}$$

Without loss of generality, we assume that  $\tau_{n,k}$  is made to LM  $\lambda_i$ . Then, we have

$$\theta(w_{n,k}) - \theta(w_{n,k-1}) = \tau_{n,k}M_i + \sum_{d \in D, a \in B^d, k \in \kappa_a^d} \mu_a^d f_{k,a}^d \left\{ 1 - \exp\left(\frac{\tau_{n,k}}{\mu_a^d}\right) \right\} \delta_{k,i}^d.$$

Note that, we always have

$$1 - \exp\left(\frac{\tau_{n,k}}{\mu_a^d}\right) \leq -\frac{\tau_{n,k}}{\mu_a^d}.$$

Therefore, it is easy to verify that

$$\theta(w_{n,k}) - \theta(w_{n,k-1}) \leq \tau_{n,k}M_i - \tau_{n,k} \left( \sum_{d \in D, a \in B^d, k \in \kappa_a^d} f_{k,a}^d \delta_{k,i}^d \right) = \tau_{n,k}(M_i - M) = \tau_{n,k}M_i \left\{ 1 - \exp\left(-\frac{\tau_{n,k}}{\tau'}\right) \right\} \leq 0,$$

where  $M$  is defined in the step 2 of the solution algorithm. Note that  $M_i$  and  $\tau'$  are constants for airport  $i$ . Therefore, by Eq (43), we have

$$\lim_{n \rightarrow +\infty} \tau_{n,k} \left\{ 1 - \exp\left(-\frac{\tau_{n,k}}{\tau'}\right) \right\} = 0. \quad (45)$$

Next, we will show that

$$\lim_{n \rightarrow +\infty} \tau_{n,k} = \tau_k = 0, \text{ for } 1 \leq k \leq n_w. \quad (46)$$

The sequence  $\{\tau_{n,k}\}_{n=1}^{+\infty}$  is bounded, otherwise, it must have a subsequence with  $\infty$  as its limit. This contradicts Eq (45). Assume that the sequence  $\{\tau_{n,k}\}_{n=1}^{+\infty}$  does not converge to zero, then  $\exists \varepsilon > 0$  and a subsequence  $\{\tau_{n,k}\}_{n \in N}$  such that

$$|\tau_{n,k} - 0| > \varepsilon, \quad n \in N.$$

Since the sequence  $\{\tau_{n,k}\}_{n \in N}$  is also bounded, there exists a convergent subsequence of  $\{\tau_{n,k}\}_{n \in N}$ . Without loss of generality, we assume that it is  $\{\tau_{n,k}\}_{n \in N}$  itself, that is, we have

$$\lim_{n \in N} \tau_{n,k} = \tau_k.$$

Note that we have

$$\tau_k \neq 0. \quad (47)$$

Further, by Eq (45), we have

$$\tau_k \left\{ 1 - \exp\left(-\frac{\tau_k}{\tau'}\right) \right\} = 0.$$

Note that the above equation has only one solution, that is  $\tau_k = 0$ , which contradicts Eq (47). Therefore, Eq (46) holds.

Further, note that

$$\|W_{n+1} - W_n\|^2 = \sum_{k=1}^{n_w} \tau_{n,k}^2.$$

By Eq (46), Eq (41) holds. This completes the proof of 1)

Let  $\{W_n\}_{n \in N_1}$  be a convergent subsequence of  $\{W_n\}_{n=1}^{+\infty}$ , and  $\lim_{n \in N_1} W_n = W_1$ . We will show that

$$W_1 \in \Omega. \quad (48)$$

Assume that

$$W_1 \notin \Omega. \quad (49)$$

Let

$$W_{n+1} = \Psi(W_n), \text{ for } n \in N_1,$$

$\{W_{n+1}\}_{n \in N_1}$  is also a subsequence of  $\{W_n\}_{n=1}^{+\infty}$ . Next, we will show that  $\{W_{n+1}\}_{n \in N_1}$  is bounded.

Since  $\{W_n\}_{n \in N_1}$  is convergent, it is bounded. That is,  $\exists M_1 > 0$  such that

$$\|W_n\| \leq M_1, \text{ for } n \in N_1.$$

By Eq (41), for a given  $\varepsilon > 0$ ,  $\exists N$  such that

$$\|W_{n+1}\| \leq \|W_n\| + \varepsilon \leq M_1 + \varepsilon, \text{ for } n \geq N.$$

Therefore,  $\|W_{n+1}\| \leq \max\{\|W_{i+1}\|_{1 \leq i \leq N-1}, M_1 + \varepsilon\}$ . That is,  $\{W_{n+1}\}_{n \in N_1}$  is bounded. Then,  $\{W_{n+1}\}_{n \in N_1}$  contains a convergent subsequence  $\{W_{n+1}\}_{n \in N_2}$ . Assume that

$$\lim_{n \in N_2} W_{n+1} = W_2.$$

By Proposition (A.2),  $\Psi$  is closed. Hence, we have

$$W_2 = \Psi(W_1).$$

Note that in Eq (49) we assume that  $W_1 \notin \Omega$ . By Proposition (A.1), we have

$$\theta(W_2) > \theta(W_1). \quad (50)$$

However,  $\{\theta(W_{n+1})\}_{n \in N_2}$  and  $\{\theta(W_n)\}_{n \in N_2}$  are subsequences of  $\{\theta(W_n)\}_{n=1}^{+\infty}$ . Therefore, we have

$$\lim_{n \in N_2} \theta(W_{n+1}) = \theta(W_2) = \lim_{n \in N_2} \theta(W_n) = \theta(W_1) = \lim_{n \rightarrow +\infty} \theta(W_n)$$

This contradicts Eq (50). Therefore, Eq (48) holds, and  $\lim_{n \rightarrow +\infty} \theta(W_n) = \theta(W_1)$ . This completes the proof of 2) and 3).  $\square$
